# Supplementary material
Source: HighWire-hosted journal article supplement (doi:10.1101/rna.079013.121)
Supplement: Supplemental_Materials.pdf [file Supplemental_Materials.pdf]

## Supplemental Materials

### Supplemental Figures

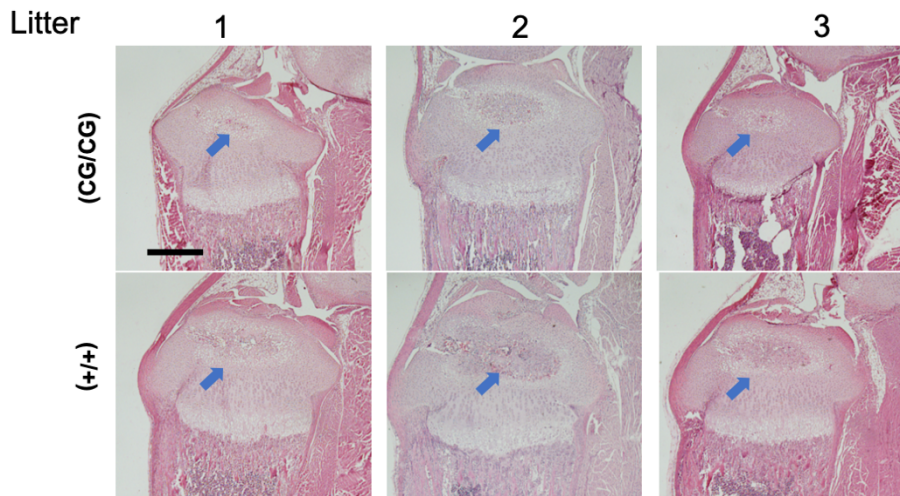

**Supplemental Figure 1.** Histology of hematoxylin and eosin-stained proximal tibias of three pairs of miR-140-CG mice and littermate controls. Arrows indicate delay in secondary ossification center formation. Scale bar presents 500  $\mu\text{m}$ .

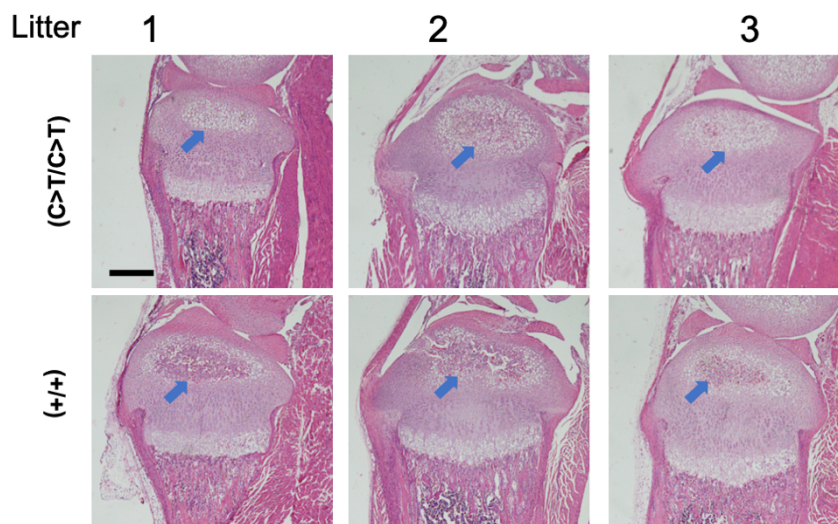

**Supplemental Figure 2.** Histology of hematoxylin and eosin-stained proximal tibia of miR-140-C>T and littermate controls. miR-140-C>T mutants were compared to littermate controls. Arrows indicate delay in secondary ossification center formation. Scale bar represents 500  $\mu\text{m}$ .



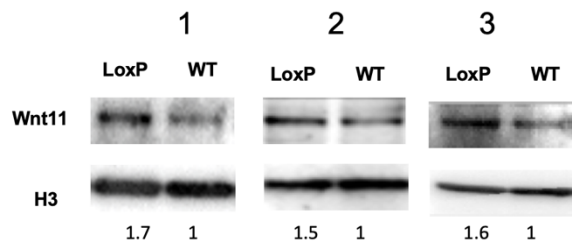

**Supplemental Figure 6.** upregulation of Wnt11 in primary rib chondrocytes of homozygous Wnt11-LoxP and their wildtype littermate control pairs. The relative signal intensity normalized to histone3 loading control is shown.

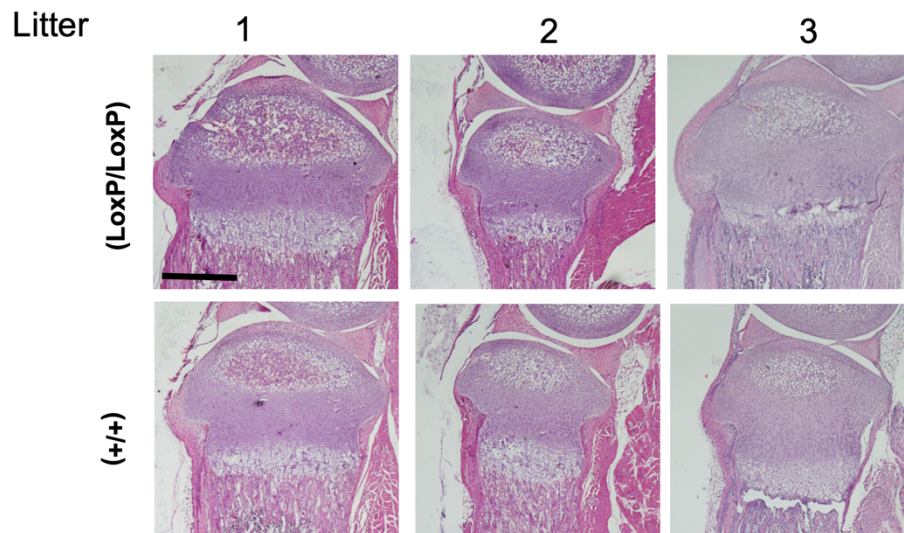

**Supplemental Figure 7.** Hematoxylin and eosin-stained proximal tibias of Wnt11-LoxP mice. Wnt11-LoxP mutants were compared to littermate controls showing a mild acceleration to the epiphyseal development of the proximal tibia consistently. Scale bar represents 500  $\mu$ m.

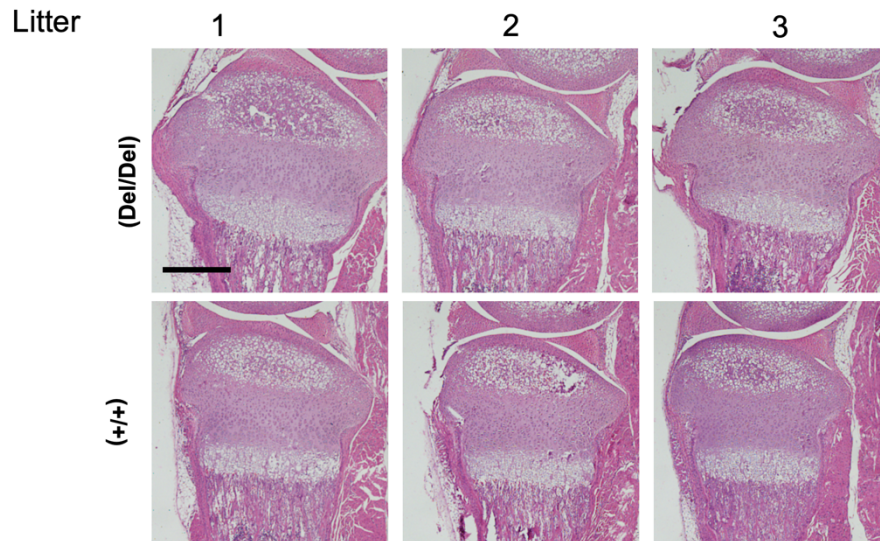

**Supplemental Figure 8.** Hematoxylin and eosin-stained Wnt11-Del mutant proximal tibias. The histology demonstrated that there is a modest acceleration in the epiphyseal development of the Wnt11-Del mutant mice in pairs 1 and 3 compared to littermate controls. Scale bar represents 500  $\mu\text{m}$ .

**Supplemental Table 1.** miR-140-3p and -5p miRNAs target lists compiled from TargetScan (v.7.2). The additional gene lists correspond to the Venn diagrams in Figure 4B.
